# Supplementary material for: A novel DNA primase-helicase pair encoded by SCCmec elements
Source: eLife journal article supplement (doi:10.7554/elife.55478), 2020-09-18
Supplement: supp [file elife_poa_e55478_Figure_2_figure_supplement_1.pdf › elife_poa_e55478_Figure_2_figure_supplement_1.pdf]

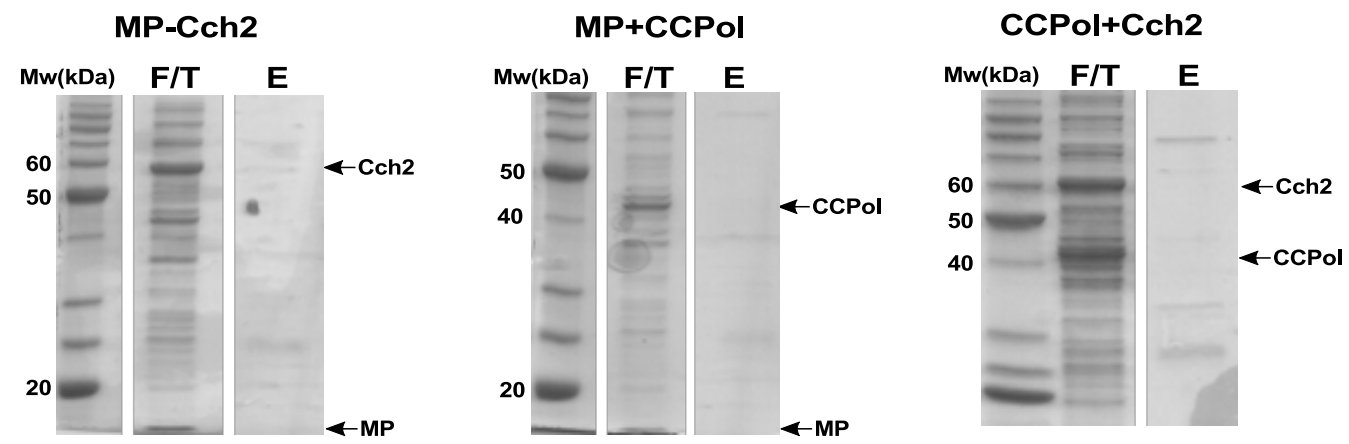

Figure 2–figure supplement 1: Pairwise pulldowns of Cch2 operon proteins: untagged controls. In each experiment (performed as those shown in Figure 2b), two proteins were co-expressed with each other. Cleared E. coli lysates were applied to Nickel-sepharose beads and flow-through (F/T) fractions were collected. Proteins were eluted with imidazole (E) and all samples were analysed on SDS-PAGE.
