# Supplementary material for: A novel DNA primase-helicase pair encoded by SCCmec elements
Source: eLife journal article supplement (doi:10.7554/elife.55478), 2020-09-18
Supplement: supp [file elife_poa_e55478_Figure_2_figure_supplement_2.pdf › elife_poa_e55478_Figure_2_figure_supplement_2.pdf]

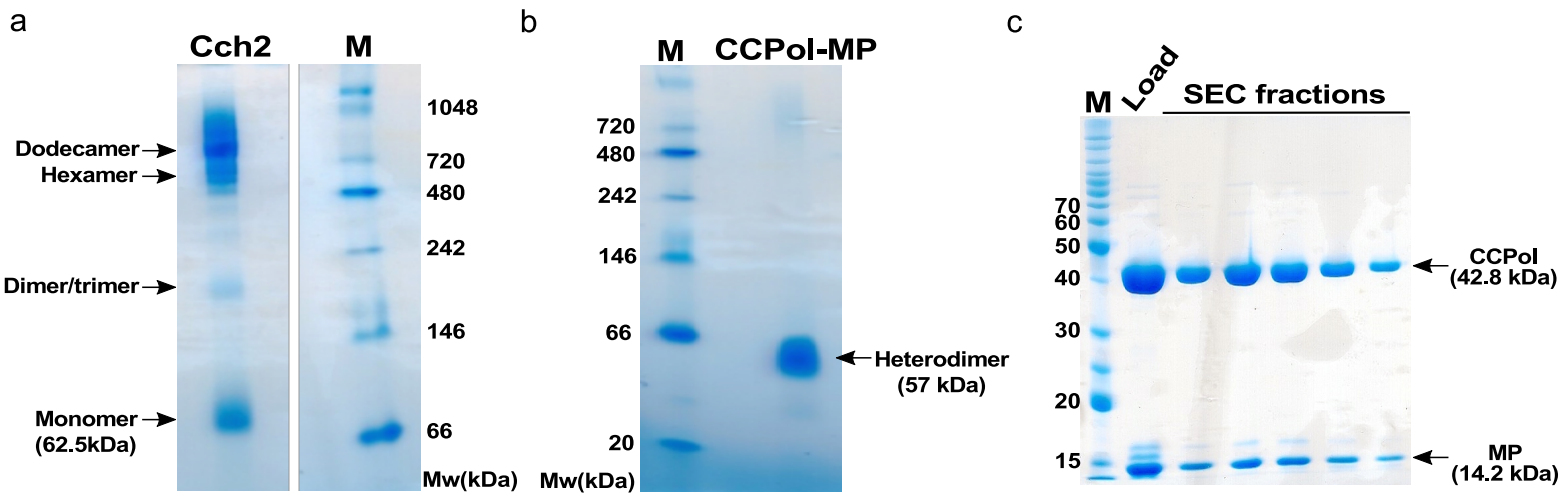

Figure 2–figure supplement 2: Oligomeric states of purified Cch2 (a) and CCPol-MP (b,c). a) Blue native PAGE of Cch2. M denotes a molecular weight marker. Note that under these conditions, the Cch2 bands migrate consistently slower than expected. b) Blue native PAGE of CCPol-MP. M denotes a molecular weight marker. c) Comigration of CCPol and MP during size exclusion chromatography on a Superdex 75 gel filtration column, analysed by SDS-PAGE. M denotes a molecular weight marker.
