# Supplementary material for: A novel DNA primase-helicase pair encoded by SCCmec elements
Source: eLife journal article supplement (doi:10.7554/elife.55478), 2020-09-18
Supplement: supp [file elife_poa_e55478_Figure_3_figure_supplement_1.pdf › elife_poa_e55478_Figure_3_figure_supplement_1.pdf]

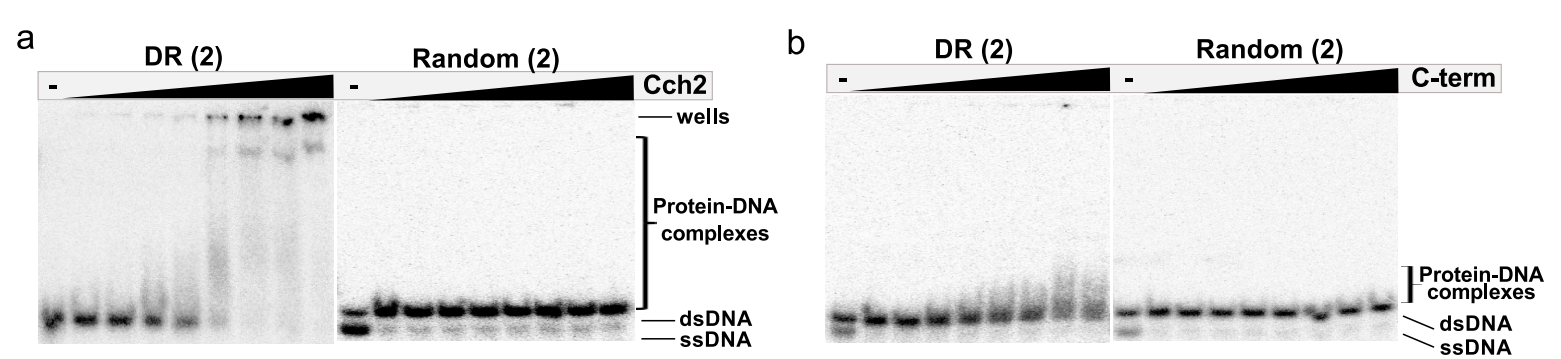

Figure 3—figure supplement 1: Binding of Cch2 and its C-terminal domain (C-term) to 23-bp ds-DNA oligos representing the DR from the putative origin of replication or a random sequence – repeat of the experiment shown in (a) Figure 3c and (b) Figure 3d. The appearance of ss-DNA in no-protein samples likely results from unwinding of the DNA duplex under low salt conditions. EMSA gel images for Cch2 binding to 23-nt ds or ss DNA oligonucleotide. Estimated protein concentrations were as follows: 0.03, 0.07, 0.13, 0.2, 0.27, 0.4, 0.53, and 0.67  $\mu$ M (see also Figure 3c).
