# Supplementary material for: A novel DNA primase-helicase pair encoded by SCCmec elements
Source: eLife journal article supplement (doi:10.7554/elife.55478), 2020-09-18
Supplement: supp [file elife_poa_e55478_Figure_3_figure_supplement_2.pdf › elife_poa_e55478_Figure_3_figure_supplement_2.pdf]

top strand

bottom strand

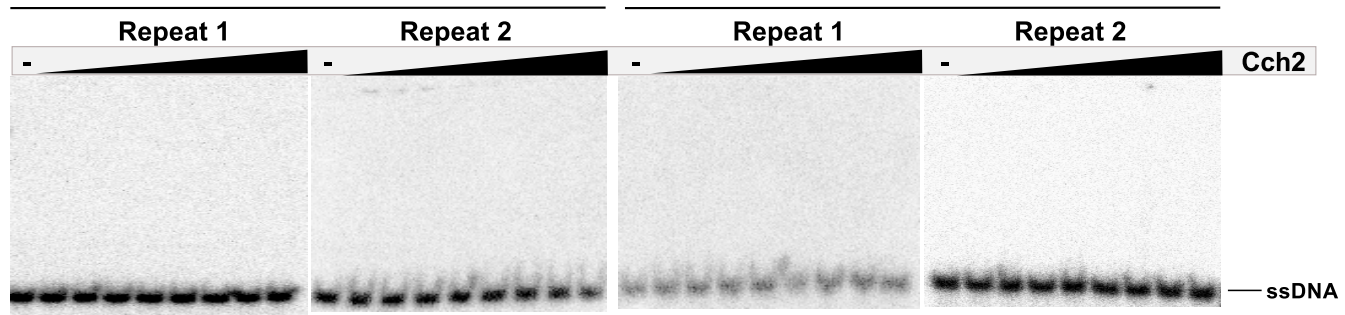

Figure 3-figure supplement 2: Binding of Cch2 to 23-nt ss-DNA oligos representing the top and bottom strands of the DR from the putative origin of replication. Two repeats for each top and bottom strand are shown.
