# Supplementary material for: A novel DNA primase-helicase pair encoded by SCCmec elements
Source: eLife journal article supplement (doi:10.7554/elife.55478), 2020-09-18
Supplement: supp [file elife_poa_e55478_Figure_5_figure_supplement_1.pdf › elife_poa_e55478_Figure_5_figure_supplement_1.pdf]

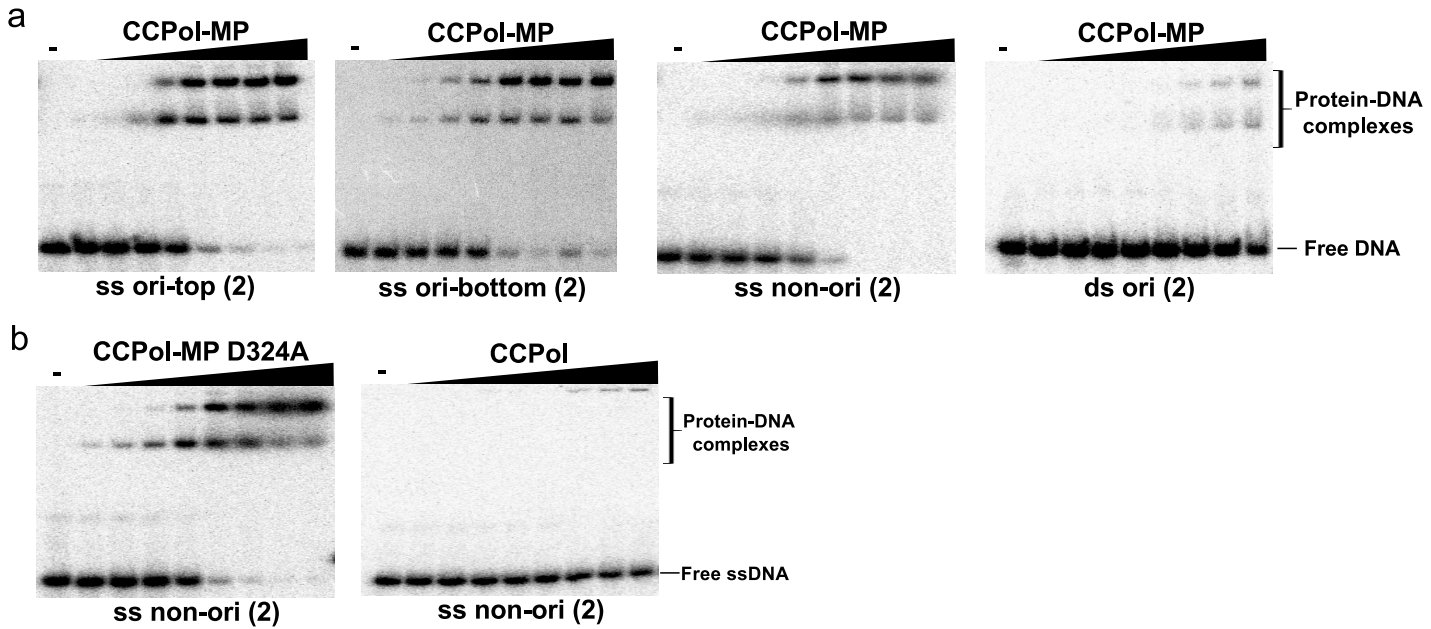

Figure 5-figure supplement 1: Binding of CCPol, CCPol-MP, and CCPol-MP D324A to 30-nt ss- and ds-DNA oligos representing a fragment of the putative origin of replication (ori) or an unrelated sequence (non-ori) – repeat of the experiments shown in (a) Figure 5a and (b) Figure 5b.
